# Supplementary material for: The human myocardium harbors a population of naive B-cells with a distinctive gene expression signature conserved across species
Source: Front Immunol. 2022 Sep 30;13:973211. doi: 10.3389/fimmu.2022.973211 (PMC9563334; doi:10.3389/fimmu.2022.973211)
Supplement: Supplementary file 4 [file Table_3.xlsx]

## Sheet: Table
KEEG pathway analysis of the genes differentially expressed between HCA cardiac B-cells and 10X Genomics circulating B-cells after removal of genes differentially expressed in digested tissue.
Category	Term	Pathway	Count	X.	PValue	Genes	List.Total	Pop.Hits	Pop.Total	Fold.Enrichment	Bonferroni	Benjamini	FDR
KEGG_PATHWAY	hsa00190	Oxidative phosphorylation	95	1.22375	1.2e-13	4694, 5464, 4695, 4696, 1340, 6391, 6392, 1337, 10975, 4729, 126328, 513, 514, 515, 55967, 4720, 516, 517, 4722, 518, 4725, 1339, 4726, 9551, 4540, 4541, 1352, 1351, 1350, 9550, 1349, 1347, 1346, 521, 1345, 522, 29796, 4697, 4698, 4731, 527, 4535, 54205, 4536, 4537, 56901, 4538, 4539, 8992, 7385, 9167, 7386, 7388, 90423, 7381, 4705, 4508, 4706, 4509, 4707, 4708, 498, 4709, 1355, 535, 1353, 539, 3…	3163	134	8156	1.82809	4.15e-11	4.61e-12	3.33e-12
KEGG_PATHWAY	hsa04714	Thermogenesis	145	1.86783	2.96e-13	284184, 4694, 4695, 4696, 6598, 1340, 1337, 51241, 112, 4729, 113, 126328, 513, 57104, 514, 515, 4720, 55967, 516, 517, 11343, 4722, 518, 4725, 1339, 4726, 25915, 1352, 1351, 1350, 1349, 1347, 1346, 521, 1345, 522, 29796, 4697, 4698, 4731, 4217, 5562, 5563, 5565, 116228, 28958, 4508, 84987, 4509, 498, 55744, 1355, 57521, 1353, 539, 374291, 10476, 54539, 10632, 2180, 9377, 8289, 6389, 1374, 55471,…	3163	232	8156	1.6116	1.02e-10	9.29e-12	6.7e-12
KEGG_PATHWAY	hsa04612	Antigen processing and presentation	51	0.656963	4.81e-06	7124, 3123, 1385, 3122, 3320, 3119, 3118, 3117, 3115, 3312, 3113, 4801, 4261, 5993, 5994, 3134, 3133, 3326, 3127, 567, 920, 1508, 925, 6890, 6892, 6891, 5641, 10437, 1514, 3458, 972, 3135, 811, 8625, 2923, 3112, 3111, 3109, 3108, 3306, 3107, 3106, 3105, 1520, 821, 5720, 5721, 3821, 3309, 3308, 3824	3163	78	8156	1.68598	0.00165654	8.58e-05	6.19e-05
KEGG_PATHWAY	hsa04666	Fc gamma R-mediated phagocytosis	59	0.760015	2.02e-05	5581, 10093, 10092, 8853, 8611, 10095, 10094, 10097, 10096, 274, 10451, 998, 8605, 5578, 5579, 5338, 27040, 3636, 5595, 7454, 4067, 3055, 1072, 10109, 207, 5788, 8613, 208, 7408, 8936, 5880, 6850, 50807, 65108, 8395, 1793, 81873, 10552, 5879, 2209, 5295, 5296, 10163, 5058, 5290, 5291, 382, 4082, 5293, 653361, 100137049, 2214, 2213, 2212, 10000, 3985, 9846, 5604, 2934	3163	97	8156	1.56841	0.00695813	0.000249	0.00018
KEGG_PATHWAY	hsa04625	C-type lectin receptor signaling pathway	62	0.79866	2.86e-05	5781, 7124, 4893, 4773, 29108, 1263, 114548, 9020, 51561, 3553, 5533, 5534, 834, 8844, 10892, 10379, 22800, 5595, 3569, 841, 1540, 602, 801, 4775, 207, 5743, 208, 805, 6714, 3845, 808, 9641, 4791, 6850, 6773, 6772, 4193, 2207, 51266, 22808, 5599, 1959, 91860, 5295, 64581, 5296, 5530, 5058, 4046, 3551, 5290, 5291, 5293, 387, 3708, 1960, 3709, 3586, 10000, 868, 5603, 8915	3163	104	8156	1.53722	0.00982591	0.000309	0.000223
KEGG_PATHWAY	hsa04640	Hematopoietic cell lineage	59	0.760015	4.68e-05	909, 7124, 3123, 3563, 3122, 1380, 3119, 3118, 3117, 1378, 3115, 951, 3554, 3113, 3553, 3674, 911, 3676, 914, 915, 916, 917, 3690, 7850, 3574, 3570, 3569, 960, 3127, 3566, 100133941, 920, 921, 966, 924, 925, 928, 929, 290, 1436, 2322, 930, 931, 3575, 933, 3655, 2209, 1438, 2208, 7037, 3672, 3112, 3111, 3109, 2812, 3108, 947, 948, 2815	3163	99	8156	1.53672	0.0160322	0.000472	0.000341
KEGG_PATHWAY	hsa04919	Thyroid hormone signaling pathway	69	0.888832	6.86e-05	8850, 4893, 2033, 25942, 4609, 476, 477, 8648, 5214, 5578, 5579, 10499, 2626, 5350, 3690, 5595, 481, 483, 29079, 488, 842, 1387, 3685, 6513, 207, 7249, 60, 208, 5469, 4853, 6714, 3845, 7068, 9882, 7067, 9442, 6772, 2099, 3065, 9440, 4193, 117247, 10231, 71, 4624, 4625, 2648, 5295, 5296, 5331, 5332, 5211, 7157, 8202, 5333, 8841, 9611, 116931, 5290, 5291, 5170, 5293, 2932, 51196, 10000, 9968, 5567,…	3163	121	8156	1.47042	0.0233837	0.000623	0.000449
KEGG_PATHWAY	hsa04662	B cell receptor signaling pathway	50	0.644081	8.95e-05	4893, 4773, 1380, 10859, 25780, 5533, 10451, 5534, 5777, 5579, 10892, 3636, 5595, 4067, 84433, 4775, 207, 208, 3845, 5880, 6850, 23547, 29760, 695, 971, 2885, 973, 930, 974, 975, 10990, 933, 5879, 11006, 5295, 5296, 5530, 3551, 5290, 5291, 353514, 5293, 2932, 2213, 10000, 10288, 5604, 5605, 27071, 8915	3163	82	8156	1.5723	0.0304055	0.000792	0.000571
KEGG_PATHWAY	hsa04611	Platelet activation	69	0.888832	0.000187	8773, 5023, 5584, 112, 146850, 2149, 113, 3674, 8605, 91807, 54518, 7450, 5592, 3690, 5595, 4067, 23533, 7094, 6916, 5908, 10627, 84876, 207, 5501, 60, 208, 7408, 6714, 6915, 4659, 8673, 6850, 2771, 1281, 6093, 2207, 695, 3937, 1278, 1277, 71, 10672, 10235, 5294, 5295, 5296, 5331, 5332, 6786, 9138, 5499, 5290, 5291, 5293, 2812, 2778, 387, 100137049, 2776, 3708, 3709, 2212, 2773, 10000, 5567, 109,…	3163	124	8156	1.43485	0.0626362	0.00134745	0.000973
KEGG_PATHWAY	hsa04380	Osteoclast differentiation	70	0.901713	0.000331	8651, 7046, 7048, 7124, 4773, 1385, 126014, 2274, 7040, 9020, 3716, 1535, 10859, 3554, 3553, 5533, 5534, 10379, 54, 7132, 3690, 5595, 3727, 2355, 1540, 140885, 207, 5468, 208, 4791, 6850, 6773, 6772, 3460, 23547, 1436, 29760, 695, 3937, 3458, 2885, 3455, 3454, 5599, 10990, 6688, 3932, 5879, 2209, 11006, 5295, 5296, 4286, 5530, 3551, 5290, 5291, 353514, 5293, 653361, 5609, 2214, 2213, 2212, 7305, …	3163	128	8156	1.41015	0.108072	0.00215755	0.00155719
KEGG_PATHWAY	hsa04660	T cell receptor signaling pathway	58	0.747134	0.000615	5063, 4690, 7124, 4893, 4773, 9020, 5062, 1019, 5533, 10451, 998, 5534, 5777, 10892, 915, 27040, 916, 917, 919, 5595, 84433, 920, 4775, 207, 5788, 208, 925, 3845, 3937, 3458, 2885, 5599, 7535, 3932, 5295, 5296, 8440, 5133, 5530, 5058, 3551, 1493, 5290, 5291, 5170, 5293, 1326, 2932, 387, 5609, 3586, 10000, 868, 5603, 5604, 5605, 3702, 8915	3163	104	8156	1.43805	0.191177	0.00359509	0.00259471
KEGG_PATHWAY	hsa04260	Cardiac muscle contraction	50	0.644081	0.00064	7169, 7168, 1340, 1337, 10975, 476, 477, 6546, 1339, 7134, 7137, 1351, 7170, 1350, 7171, 481, 483, 1349, 1347, 1346, 444, 1345, 488, 29796, 845, 10345, 7385, 9167, 7386, 7388, 7381, 775, 70, 7139, 4624, 4625, 10479, 9377, 6262, 781, 1327, 4519, 783, 4633, 4512, 4634, 4513, 4635, 4514, 1329	3163	87	8156	1.48193	0.19805	0.00365473	0.00263776
KEGG_PATHWAY	hsa04659	Th17 cell differentiation	59	0.760015	0.00108355	9466, 7046, 7048, 4773, 3123, 3122, 3320, 3561, 3560, 7040, 196, 3716, 3119, 3118, 3117, 3115, 51561, 3554, 3113, 3553, 5533, 5534, 915, 27040, 916, 917, 919, 5595, 3572, 3570, 3569, 3326, 3127, 3566, 920, 4775, 6772, 3460, 6095, 3458, 5599, 30009, 7535, 3932, 50615, 5914, 4087, 4088, 5530, 4089, 3112, 3111, 3551, 3109, 3108, 861, 6776, 6778, 5603	3163	108	8156	1.40866	0.312043	0.00568389	0.00410229
KEGG_PATHWAY	hsa04723	Retrograde endocannabinoid signaling	73	0.940358	0.0086102	4694, 4695, 4696, 2791, 2790, 2788, 112, 4729, 2787, 113, 126328, 2785, 2783, 55967, 5578, 4720, 5579, 11343, 4722, 4725, 4726, 94235, 5595, 4540, 4541, 55970, 4697, 4698, 5743, 4731, 4535, 4536, 4537, 56901, 4538, 4539, 2771, 222236, 4705, 4706, 4707, 773, 4708, 4709, 775, 59345, 5599, 374291, 4701, 4702, 54539, 4704, 5331, 5332, 4716, 4717, 4718, 2776, 4719, 2775, 3708, 3709, 2773, 51079, 10681…	3163	148	8156	1.27186	0.949379	0.0356991	0.0257654
KEGG_PATHWAY	hsa04672	Intestinal immune network for IgA production	28	0.360685	0.0146322	5284, 23308, 4055, 3123, 3122, 7040, 9020, 3119, 3118, 3117, 3115, 56477, 3113, 3676, 10673, 958, 6387, 8741, 3112, 3111, 3109, 3108, 3569, 115650, 3127, 3586, 23495, 608	3163	49	8156	1.47347	0.993814	0.0542809	0.0391766
KEGG_PATHWAY	hsa04664	Fc epsilon RI signaling pathway	36	0.463738	0.0220384	5880, 6850, 7124, 4893, 2207, 3937, 695, 2885, 10451, 5599, 5578, 8605, 27040, 5879, 5295, 5296, 5595, 4067, 5290, 5291, 5170, 240, 5293, 241, 5609, 100137049, 10000, 207, 208, 6416, 9846, 5603, 5604, 3845, 5605, 5606	3163	68	8156	1.36512	0.999542	0.0768004	0.0554298
KEGG_PATHWAY	hsa04670	Leukocyte transendothelial migration	56	0.721371	0.0239447	5781, 7122, 23562, 1536, 1535, 10451, 998, 5578, 11069, 5579, 3676, 10411, 90952, 4267, 29119, 7294, 5829, 5908, 10627, 60, 7408, 5747, 6494, 5880, 2771, 58494, 3383, 6093, 58498, 83692, 7414, 10398, 71, 5879, 5295, 5296, 5175, 7430, 6387, 1495, 5290, 5291, 5293, 387, 653361, 1366, 1003, 2773, 81, 4478, 4633, 5603, 4636, 103910, 3702, 87	3163	114	8156	1.26666	0.999766	0.0826094	0.0596224
KEGG_PATHWAY	hsa00230	Purine metabolism	62	0.79866	0.0242344	5140, 5141, 5142, 5144, 8654, 270, 9060, 271, 2272, 272, 471, 2987, 353, 112, 113, 158, 2984, 53343, 5137, 5139, 318, 102157402, 84284, 5151, 5152, 5471, 6240, 5198, 4860, 5631, 124583, 374659, 3251, 51292, 56985, 50484, 204, 51816, 22978, 5167, 11164, 132, 3615, 3614, 1633, 51020, 4907, 5634, 1716, 5136, 3704, 100, 10846, 55276, 10606, 8833, 4831, 109, 2618, 4833, 10201, 30833	3163	128	8156	1.24899	0.999789	0.0827809	0.0597462
KEGG_PATHWAY	hsa04926	Relaxin signaling pathway	62	0.79866	0.0289455	7046, 7048, 4893, 1385, 2791, 2790, 7040, 2788, 112, 2787, 113, 2785, 2783, 5578, 94235, 5595, 64764, 55970, 1388, 148327, 1386, 207, 208, 408, 6714, 3845, 7422, 7424, 7423, 2771, 1285, 1284, 1282, 1281, 2885, 59345, 1278, 1277, 5599, 2769, 5295, 5296, 4087, 5331, 6464, 5332, 5290, 5291, 5293, 2778, 5609, 2775, 2773, 10000, 10681, 5567, 6416, 109, 6019, 5603, 5604, 5605	3163	129	8156	1.23931	0.99996	0.0969533	0.069975
KEGG_PATHWAY	hsa04658	Th1 and Th2 cell differentiation	46	0.592554	0.0297076	6772, 6775, 4773, 3123, 3122, 3561, 3560, 3460, 4094, 3516, 3716, 3119, 3118, 3458, 3117, 3115, 3113, 5533, 5599, 5534, 7535, 30009, 915, 3932, 27040, 916, 917, 919, 5595, 5530, 3112, 3551, 3111, 182, 3109, 3108, 3127, 3566, 55534, 864, 920, 4775, 6776, 4853, 6778, 5603	3163	92	8156	1.28928	0.99997	0.0985493	0.0711269
KEGG_PATHWAY	hsa00240	Pyrimidine metabolism	30	0.386449	0.0532183	22978, 5167, 7084, 790, 79077, 1635, 1854, 1633, 51020, 4907, 115024, 978, 318, 51727, 6240, 7378, 1890, 124583, 7372, 1723, 1841, 51251, 54963, 50484, 1806, 4831, 4833, 129607, 10201, 30833	3163	58	8156	1.33374	1	0.162481	0.117269
KEGG_PATHWAY	hsa04922	Glucagon signaling pathway	51	0.656963	0.0556807	5140, 5223, 5224, 1385, 2033, 5260, 57223, 1375, 5533, 5214, 5534, 150094, 64764, 2997, 1387, 148327, 1386, 6513, 801, 207, 208, 5106, 805, 808, 5162, 5562, 5563, 5565, 5160, 2203, 5834, 31, 32, 91860, 5331, 5530, 5332, 5211, 5256, 5257, 1374, 3276, 23235, 2778, 2776, 55671, 3708, 3709, 10000, 5567, 3945	3163	107	8156	1.22904	1	0.167919	0.121194
KEGG_PATHWAY	hsa04261	Adrenergic signaling in cardiomyocytes	69	0.888832	0.0578299	7169, 7168, 1385, 154, 596, 112, 146850, 476, 113, 477, 6546, 5578, 11069, 10411, 5350, 7134, 5595, 64764, 7137, 7170, 23533, 7171, 481, 1390, 483, 55012, 488, 1388, 148327, 1386, 801, 207, 5501, 208, 805, 808, 6332, 5520, 2771, 490, 493, 775, 70, 7139, 4624, 4625, 5518, 5294, 91860, 6262, 5331, 5332, 5499, 183, 781, 2778, 783, 2776, 2773, 10000, 5523, 5567, 4633, 109, 5525, 4634, 4635, 5603, 5529	3163	150	8156	1.18614	1	0.170524	0.123074
KEGG_PATHWAY	hsa04062	Chemokine signaling pathway	86	1.10782	0.0664673	6351, 58191, 6352, 4893, 2870, 2791, 2790, 156, 2788, 112, 146850, 2787, 113, 2785, 2783, 6348, 10451, 998, 6347, 2829, 5579, 6349, 2309, 2869, 5196, 94235, 5197, 5473, 5595, 7454, 4067, 3055, 23533, 55970, 5829, 5908, 643, 207, 208, 408, 6714, 5747, 3845, 6375, 5880, 6773, 6772, 9844, 2771, 9560, 6093, 1236, 2885, 1235, 59345, 56477, 10235, 6846, 5879, 5294, 5295, 5296, 5331, 6464, 5332, 6387, 5…	3163	192	8156	1.15498	1	0.19074	0.137665
KEGG_PATHWAY	hsa04960	Aldosterone-regulated sodium reabsorption	20	0.257632	0.0812638	5295, 5296, 5595, 9351, 5290, 481, 5291, 5170, 483, 5293, 23327, 476, 3479, 477, 5578, 6446, 5579, 3643, 4306, 3845	3163	37	8156	1.39382	1	0.222508	0.160593
KEGG_PATHWAY	hsa00520	Amino sugar and nucleotide sugar metabolism	25	0.32204	0.093724	4351, 6675, 2592, 8790, 7360, 2821, 2762, 51167, 5973, 51005, 51706, 5373, 55907, 64841, 2584, 132789, 3074, 3073, 54187, 55276, 55577, 606495, 2673, 9945, 197258	3163	49	8156	1.31559	1	0.249537	0.180101
KEGG_PATHWAY	hsa04623	Cytosolic DNA-sensing pathway	31	0.39933	0.0947517	6351, 9641, 5440, 6352, 5441, 9447, 3661, 29108, 23586, 9560, 51082, 3553, 115004, 84265, 5434, 834, 55703, 5435, 5437, 57506, 11128, 51728, 3551, 661, 10623, 3569, 103, 171568, 3606, 10622, 10621	3163	63	8156	1.26882	1	0.249537	0.180101
